# Supplementary material for: 3D-printable, highly conductive hybrid composites employing chemically-reinforced, complex dimensional fillers and thermoplastic triblock copolymers
Source: Royal Society of Chemistry journal article supplement (doi:10.1039/c6nr09610g), 2017-01-01
Supplement: c6nr09610g5.pdf [file c6nr09610g5.pdf]

## Supplementary Information

### 3D-Printable, Highly Conductive Hybrid Composites Employing Chemically-Reinforced, Complex Dimensional Fillers and Thermoplastic Triblock Copolymers

Yejin Jo,<sup>a,†</sup> Ju Young Kim,<sup>a,b,†</sup> So-Yun Kim,<sup>c,†</sup> Yeong-Hui Seo,<sup>d</sup> Kwang-Suk Jang,<sup>e</sup> Su Yeon Lee,<sup>a</sup> Sungmook Jung,<sup>a</sup> Beyong-Hwan Ryu,<sup>a</sup> Hyun-Suk Kim,<sup>b</sup> Jang-Ung Park,<sup>c,\*</sup> Youngmin Choi,<sup>a,\*</sup> Sunho Jeong<sup>a,\*</sup>

<sup>a</sup>Division of Advanced Materials, Korea Research Institute of Chemical Technology (KRICT), 19 Sinseongno, Yuseong-gu, Daejeon 305-600, Korea. E-mail: youngmin@kRICT.re.kr; sjeong@kRICT.re.kr

<sup>b</sup>Department of Materials Science and Engineering, College of Engineering, Chungnam National University, 99 Daehak-ro, Yuseong-gu, Daejeon 305-764, Korea.

<sup>c</sup>School of Materials Science and Engineering, Wearable Electronics Research Group, Smart Sensor Research Center, Ulsan National Institute of Science and Technology (UNIST), Ulsan 689-798, Korea. E-mail: jangung@unist.ac.kr

<sup>d</sup>Department of Materials Science and Engineering, University of Illinois at Urbana-Champaign, Urbana, IL, USA

<sup>e</sup>Department of Chemical Engineering, Hankyong National University, 327 Jungang-ro,

Anseong 17579, Republic of Korea

†Y. Jo, J. Y. Kim, S.-Y. Kim contributed equally.

**Fabrication of Wireless Power Transmission Modules.** The wireless power transmission modules were composed of a receiving antenna, a rectifying circuit and an OLED. To prepare the receiving antennas on the non-planar substrates, we first prepared SU8 structures by photolithographic patterning of SU8 (SU-8 3050, MicroChem Corp.) on PET substrates. The cylindrical (diameter = 350  $\mu\text{m}$  and thickness = 50  $\mu\text{m}$ ) and rectangular structures with grooves (area = 80 x 80  $\mu\text{m}^2$  and thickness = 50  $\mu\text{m}$ ) were periodically arranged with a center-to-center distance of 4350  $\mu\text{m}$  and 120  $\mu\text{m}$ , respectively. After that, the hybrid composite paste was printed onto a planar/non-planar substrate that had 6 helical turns as an inner coil and a single turn as an outer coil with a  $500 \pm 50$   $\mu\text{m}$  line width. The rectifier was composed of a commercial silicon diode and a capacitor that were connected in a series, and an OLED was arranged in parallel to the circuit. The OLED was manufactured by spin-coating of 50 nm-thick poly(3,4-ethylenedioxythiophene):poly(styrenesulfonate) (AI4083, Clevios) and a 100 nm-thick emitting layer (PDY-132, Merck) on a ITO coated glass substrate. After that, LiF (1 nm)/Al (100 nm) was thermally evaporated for the cathode electrode. In order to harvest the radio frequency power, sine waves (frequency = 78 MHz and 80 MHz and amplitude = -13 dBm) were generated using a signal generator (N5183A MXG Analog Signal Generator, Agilent) and were amplified as much as 55 dB by a power amplifier (A-300RF power amplifier, Electronic Navigation Industries). This amplified AC signal was fed to a transmitting antenna, which was designed to have a single loop coil. After that, the AC signal was transmitted to the receiving antennas by inductive coupling. Finally, the wirelessly received AC signal with over 11  $V_{\text{rms}}$  was converted to a DC signal through the rectifying circuit in order to operate the OLED.

**Table S1.** Elemental analysis results of pristine MWCNTs and NH<sub>2</sub>-MWCNTs

| MWCNT                  | C (%) | H (%) | N (%) | S (%) |
|------------------------|-------|-------|-------|-------|
| pristine MWCNT         | 97.0  | -     | -     | -     |
| NH <sub>2</sub> -MWCNT | 89.7  | 1.0   | 2.7   | -     |

**Table S2.** Conductivities of pristine MWCNT(50 wt%)/PVDF(50 wt%) and NH<sub>2</sub>-MWCNT (50 wt%)/PVDF(50 wt%) composite films

| Filler                 | Film thickness (μm) | Conductivity (S/cm) |
|------------------------|---------------------|---------------------|
| Pristine MWCNT         | 11.2                | 9.9                 |
| NH <sub>2</sub> -MWNCT | 6.9                 | 11.9                |

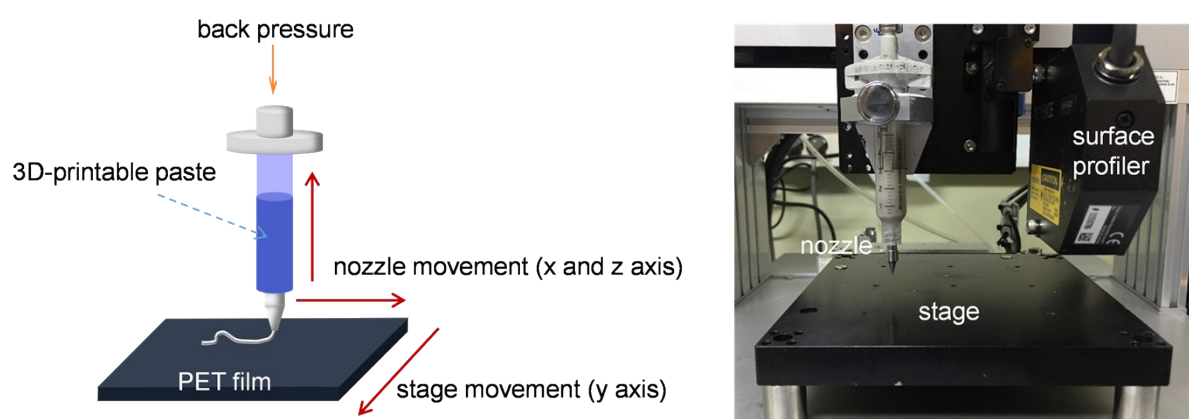

**Figure S1.** The schematic and picture of printing machine used in this study.

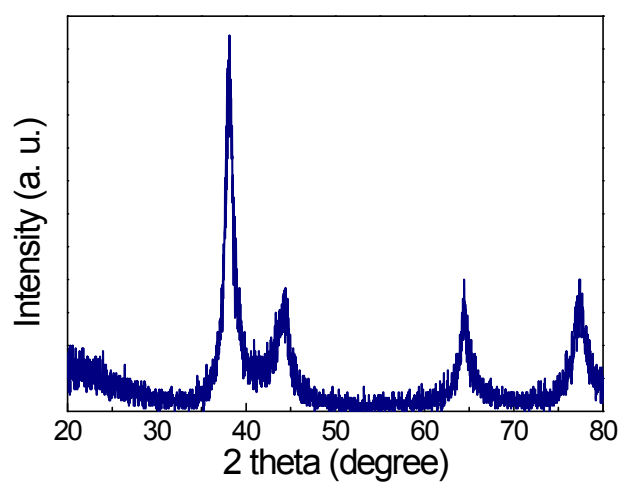

**Figure S2.** XRD result for PAA-capped silver nanoparticles.

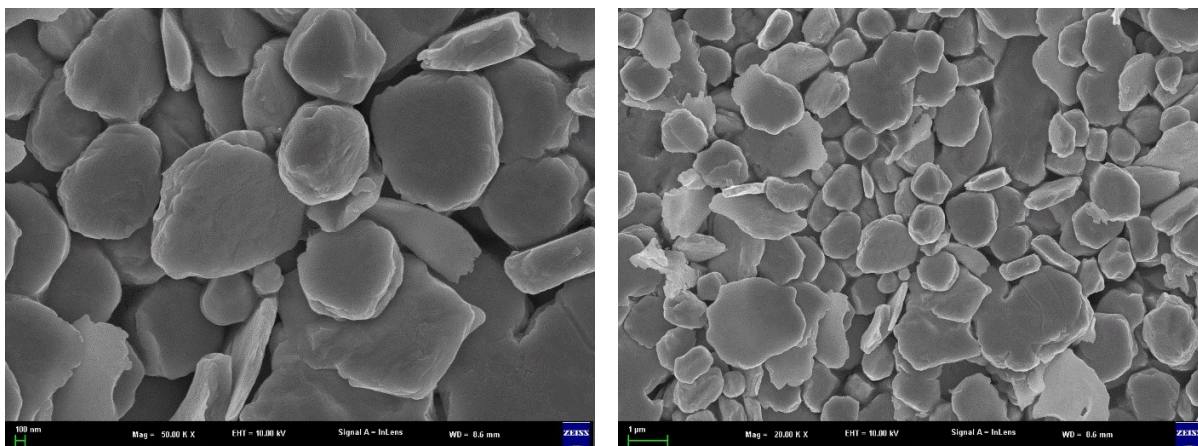

**Figure S3.** SEM image for Ag flakes used in this study.

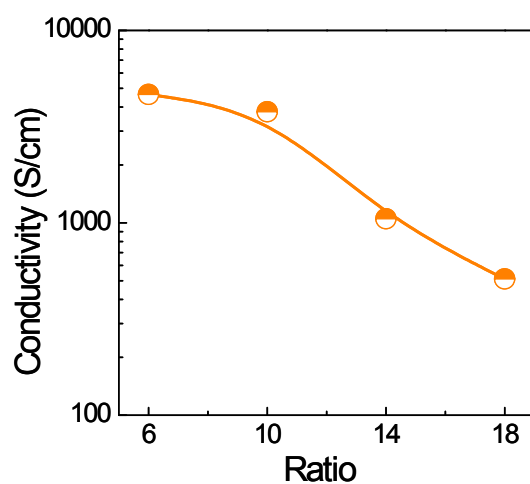

**Figure S4.** The conductivity evolution of composite materials, composed of  $\text{NH}_2$ -MWCNT, PAA-Ag NP, Ag flake and SIS triblock copolymer, depending on the ratio of Ag flake to the PAA-Ag NP/ $\text{NH}_2$ -MWCNT hybrid. The filler composition was 88 wt% in dried films and the solvent composition was 40 wt% in the paste

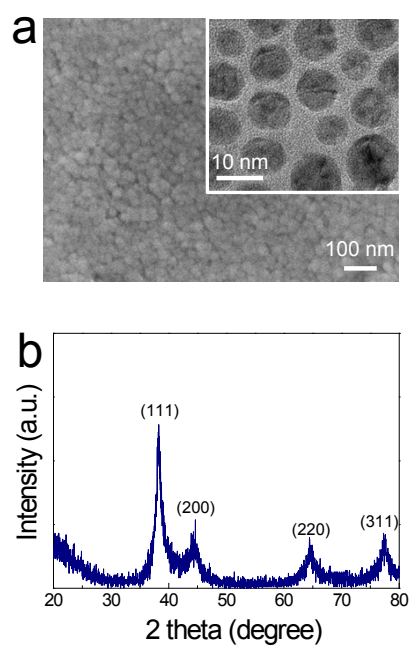

**Figure S5.** (a) SEM and TEM (inset) images and (b) XRD results for oleic acid-capped silver nanoparticles.

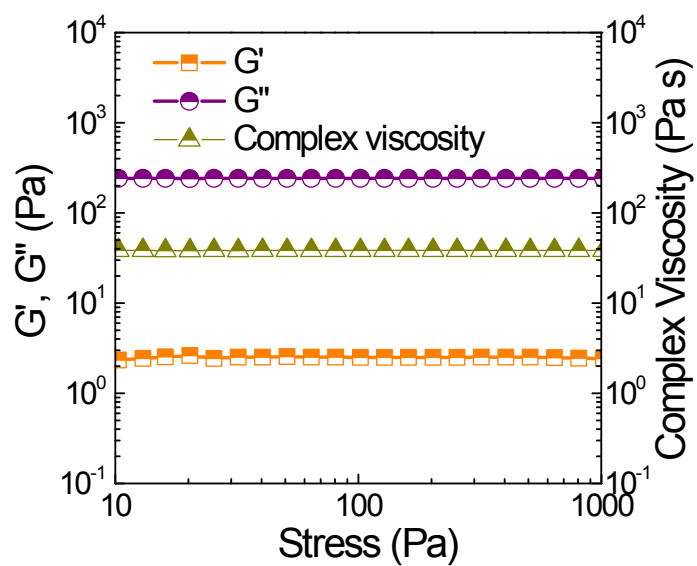

**Figure S6.** The rheological properties of polymer solution including SIS without fillers. The concentration of polymer was 32 wt%.

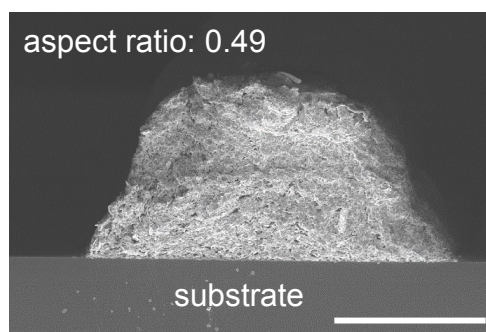

**Figure S7.** The cross-sectional image for the pattern printed using a hybrid composite material. The filler composition was 94 wt% in a dried film, the weight ratio of Ag flakes to the PAA-Ag NP/NH<sub>2</sub>-MWCNT hybrid was 14, and the solvent composition was 16 wt% in the paste. The scale bar is 100  $\mu\text{m}$ .

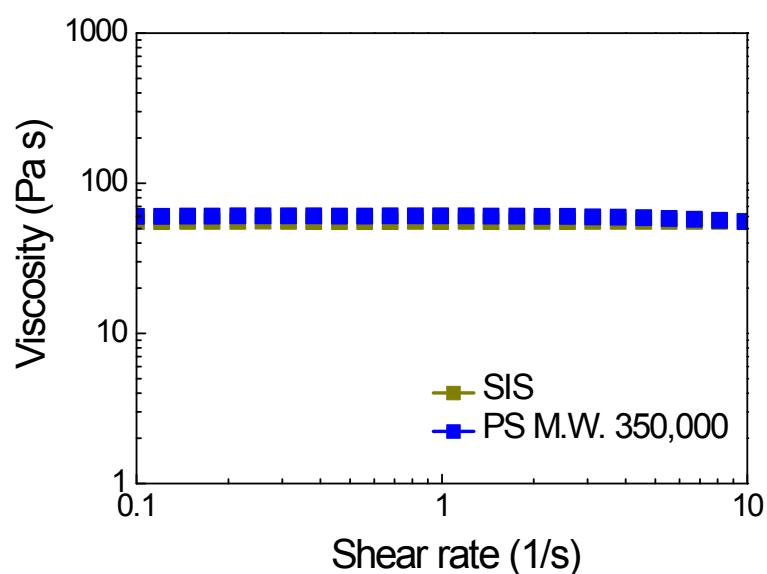

**Figure S8.** The viscosities of polymer solutions comprising either dichlorobenzene and SIS, or dichlorobenzene and PS with a molecular weight of 350,000. The concentration of polymers was 32 wt%.



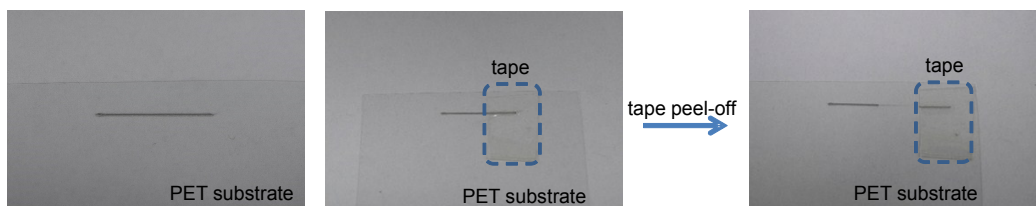

**Figure S9.** The adhesion test results for line patterns printed using composite paste employing PS with a molecular weight of 350,000. The filler composition was 94 wt% in a dried film, the weight ratio of Ag flake to the PAA-Ag NP/ $\text{NH}_2$ -MWCNT hybrid was 14, and the solvent composition was 16 wt% in the paste.

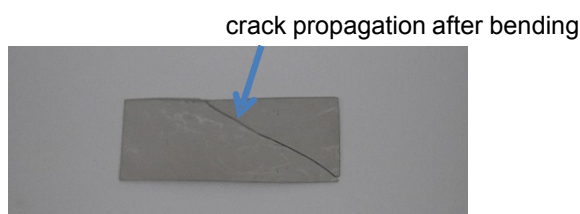

**Figure S10.** The photograph for the film, prepared using composite paste employing PS with a molecular weight of 350,000, after once simple bending test. The filler composition was 94 wt% in a dried film, the weight ratio of Ag flake to the PAA-Ag NP/ $\text{NH}_2$ -MWCNT hybrid was 14, and the solvent composition was 40 wt% in the paste.

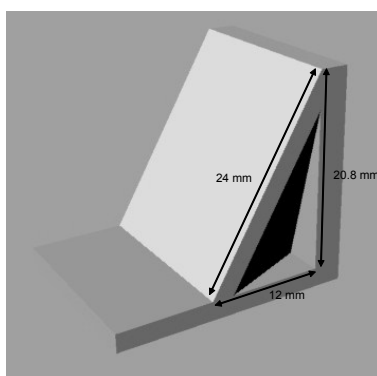

**Figure S11.** The dimension of the SLA-printed structure.

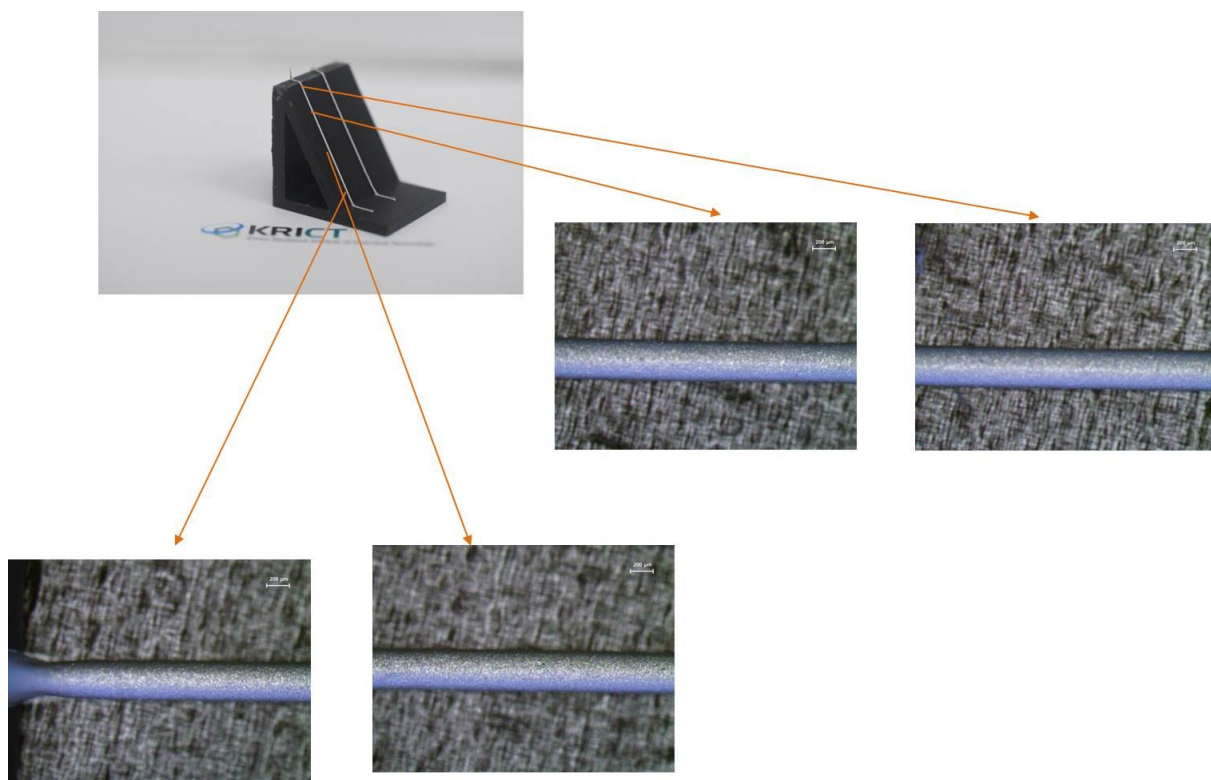

**Figure S12.** The optical microscopy images for line pattern printed on the SLA-printed structure with a slope of  $60^\circ$ .

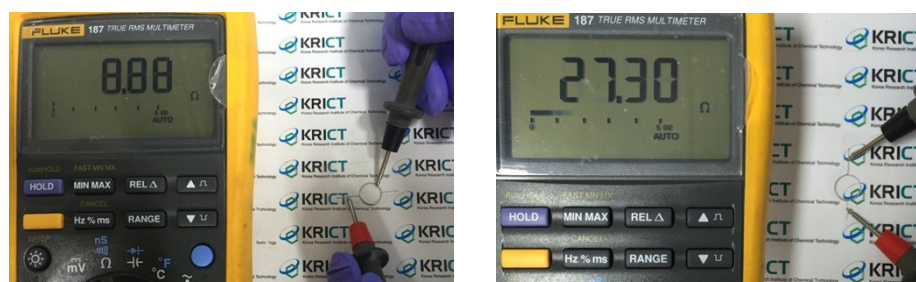

**Figure S13.** Photographs showing the electrical current flow between the side line and the top layer, and between both side lines.

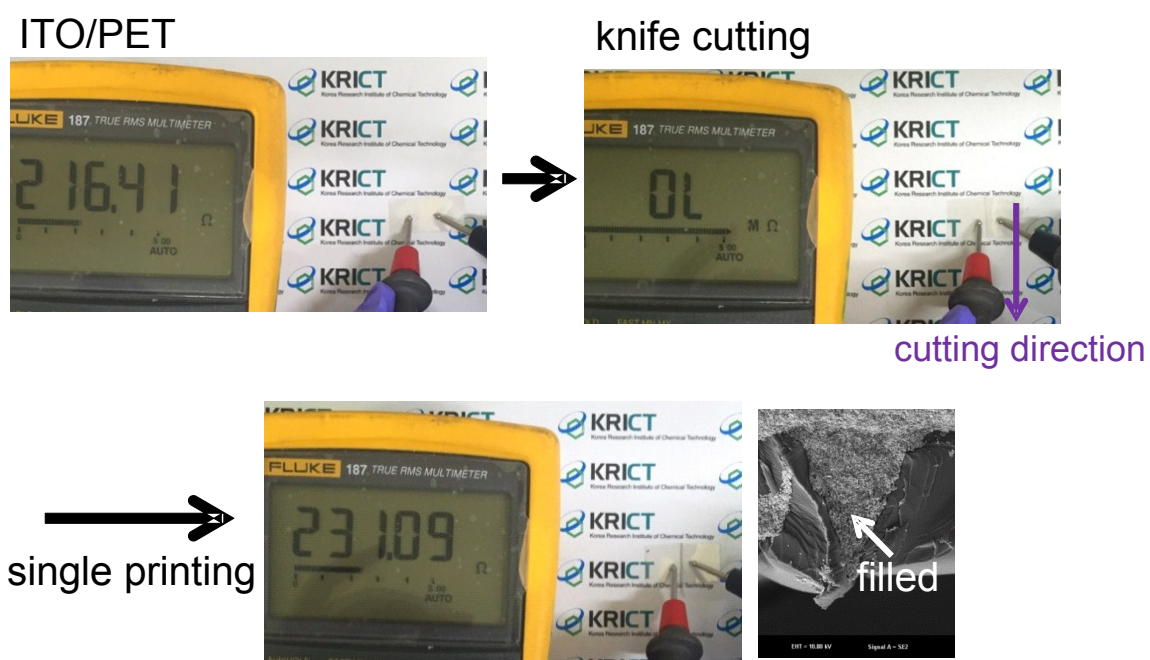

**Figure S14.** Photographs showing the “repairing” process for a broken electrical component by a simple dispensing of hybrid composite paste.

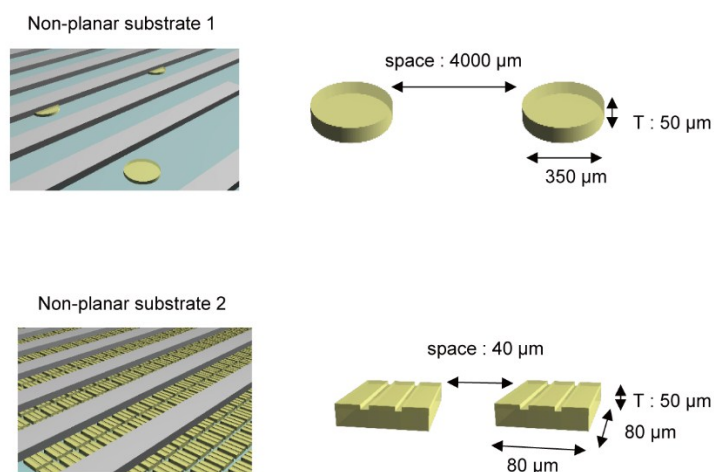

**Figure S15.** Schematic illustration showing the design of the SU-8 structures for fabrication of the non-planar substrates on PET films.

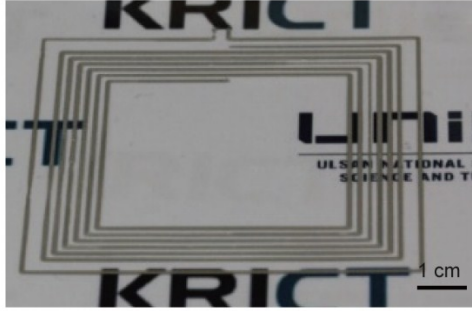

**Figure S16.** Photograph of the printed antenna on the planar PET substrate.

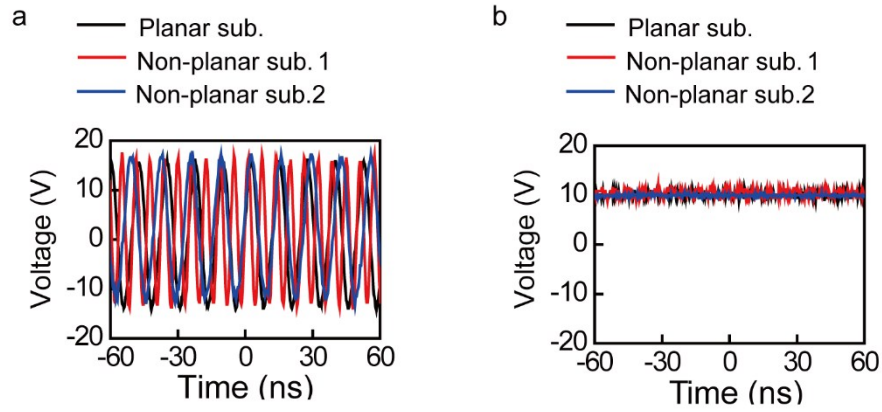

**Figure S17.** (a) The measured sinusoidal curves of transient voltages wirelessly transmitted to three different types of antennas, and (b) their rectified DC signals.

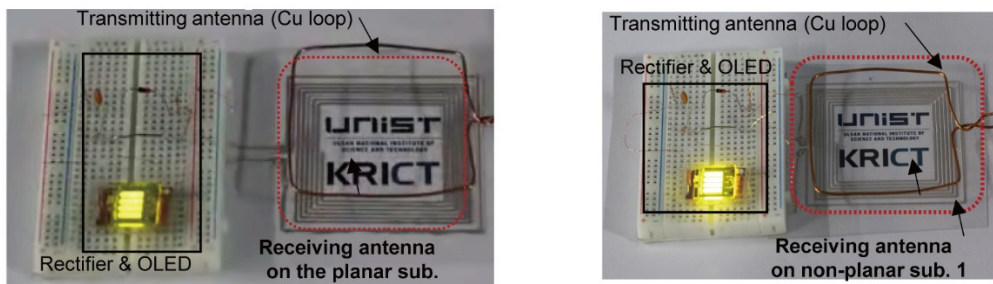

**Figure S18.** Wireless operation of the OLEDs using the antennas printed on the planar substrate and non-planar substrate 1.

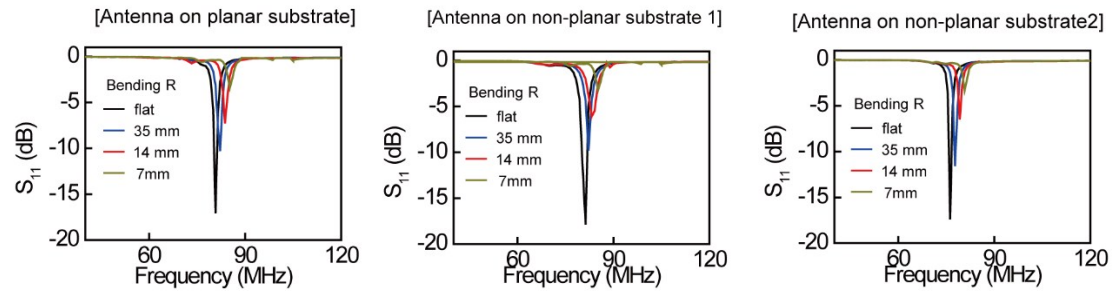

**Figure S19.** The frequency response of reflection coefficient ( $S_{11}$ ) along with the mechanical bending by varying the radius curvature of the antennas printed on three types of substrates.

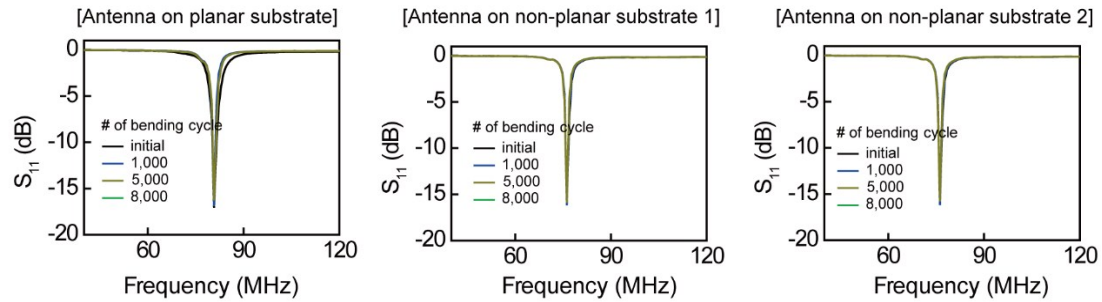

**Figure S20.** The frequency response of the reflection coefficient ( $S_{11}$ ) along with the bending cycle ( $R = 7$  mm) of the antennas printed on three types of substrates.

**Movie S1.** Motion picture showing the printing process using highly viscous composite paste.

**Movie S2.** Wireless power transmission module using an antenna on a planar substrate .

**Movie S3.** Wireless power transmission module using an antenna on a non-planar substrate 1.

**Movie S4.** Wireless power transmission module using an antenna on a non-planar substrate 2.
